# Supplementary material
Source: MDPI journal article supplement (https://www.mdpi.com/2073-4441/16/10/1327)
Supplement: s1 [file s1]

## Supplementary materials

### Integrated Unit for Azo Dichlorotriazine dye Treatment: Influence of Physical treatment, Chemical Treatment, and Biological treatment with Statistical analysis of Experimental data

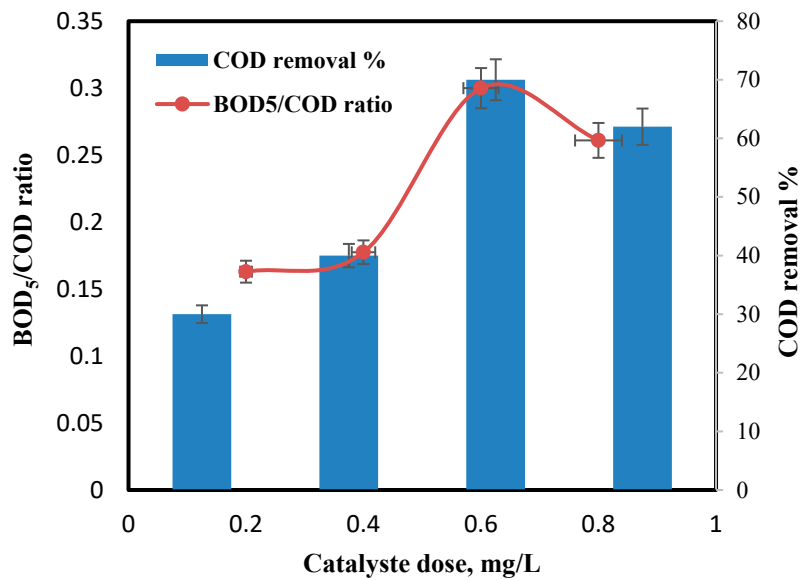

**Figure S1.** Effect of catalyst dose on COD removal percent and BOD<sub>5</sub>/COD ratio in homogeneous photo-catalytic oxidation by Fenton oxidation [pH=3, reaction time = 60 min, H<sub>2</sub>O<sub>2</sub> =1.5mL/L, 20 mL/min flow rate, and initial dye concentration = 0.75gm/L]

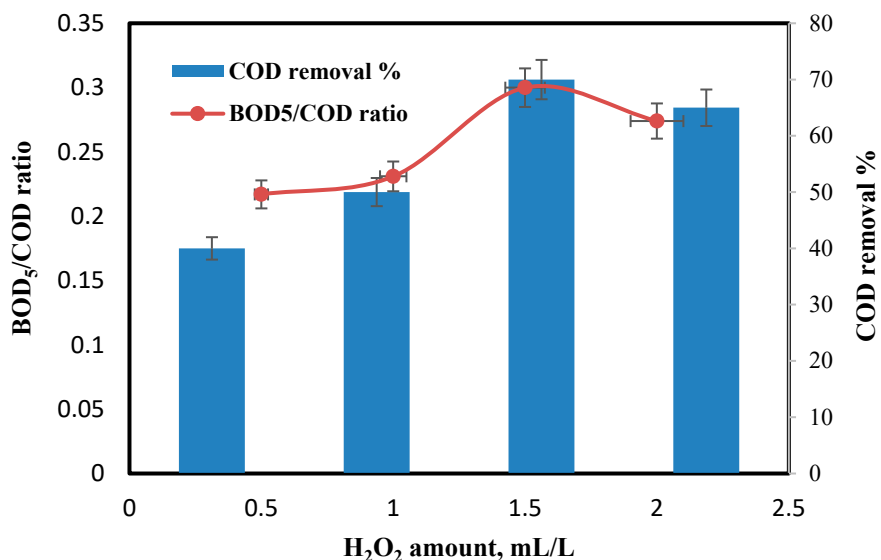

**Figure S2.** Effect of the hydrogen peroxide amount on COD removal percent and BOD<sub>5</sub>/COD ratio, in the homogeneous photo-catalytic oxidation by Fenton oxidation [pH=3, catalyst dose= 0.6 gm/L, reaction time = 60 min, 20 mL/min flow rate, and initial dye concentration = 0.75 gm/L]

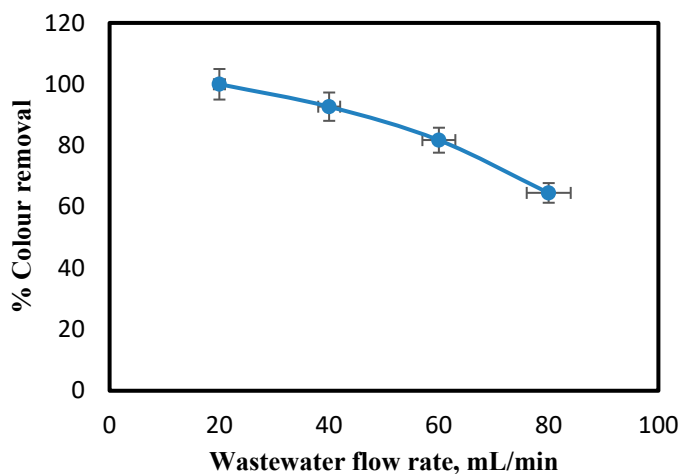

**Figure S3:** Effect of wastewater flow rate on the colour removal percent in homogeneous photo-catalytic oxidation by Fenton oxidation [pH=3, Catalyst dose = 0.6 gm/L, reaction time = 30 min, H<sub>2</sub>O<sub>2</sub>=1.5 mL/L, and initial dye concentration = 0.75 gm/L]

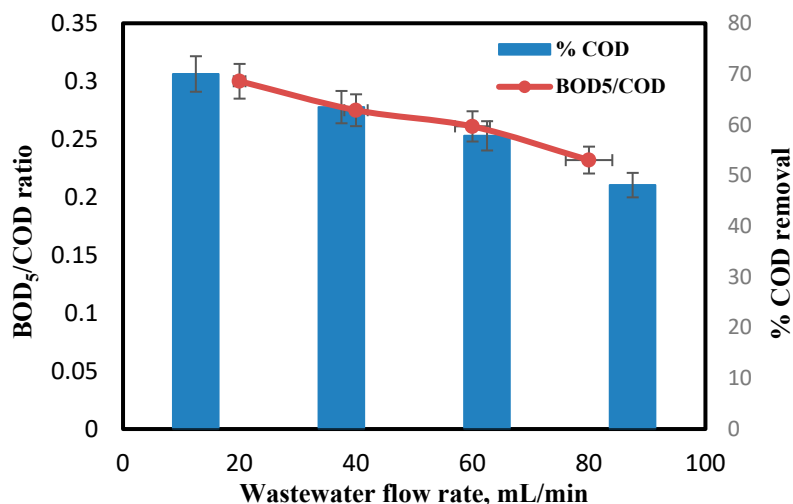

**Figure S4:** Effect of wastewater flow rate on the COD removal percent and BOD<sub>5</sub>/COD ratio in homogeneous photo-catalytic oxidation by Fenton oxidation [pH=3, Catalyst dose = 0.6 gm/L, reaction time = 60 min, H<sub>2</sub>O<sub>2</sub> = 1.5 mL/L, and initial dye concentration = 0.75 gm/L]

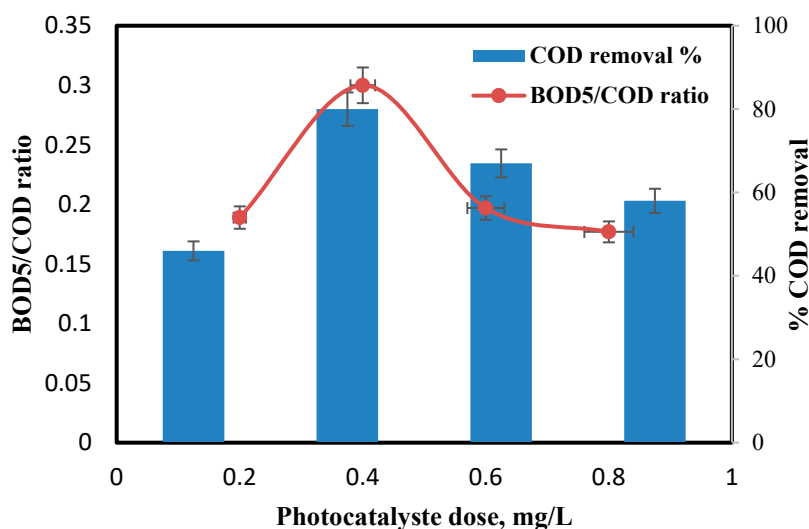

**Figure S5.** Effect of photocatalyst dose on COD removal % in homogeneous photo- catalytic oxidation by photo-Fenton oxidation [pH=3, reaction time = 60 minutes, H<sub>2</sub>O<sub>2</sub> = 1mL/L, 20 mL/min flow rate, initial dye concentration = 0.75 gm/L, and 75-watt light intensity]

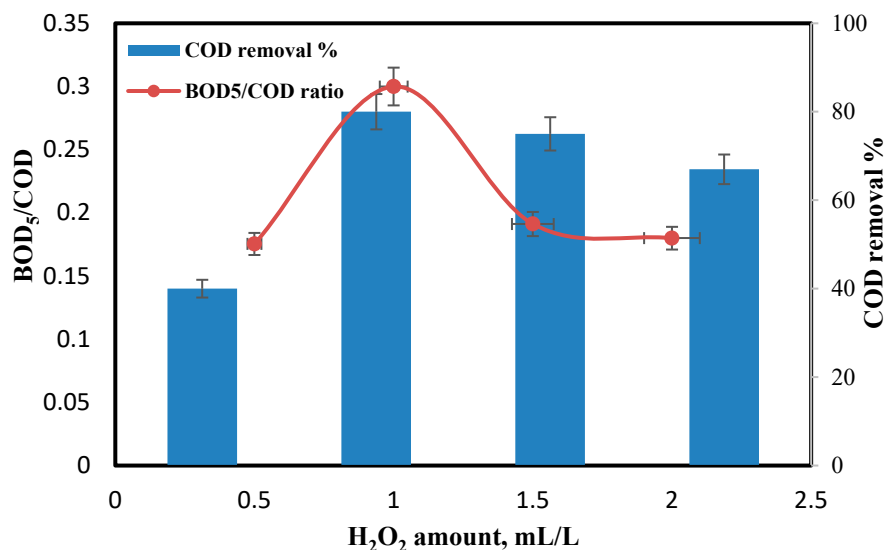

**Figure S6:** Effect of hydrogen peroxide amount on COD removal % in the homogeneous photocatalytic oxidation by photo-Fenton oxidation [pH=3, Catalyst dose = 0.4 gm/L, reaction time = 60 minutes, 20 mL/min flow rate, initial dye concentration = 0.75 gm/L, and 75-watt light intensity]

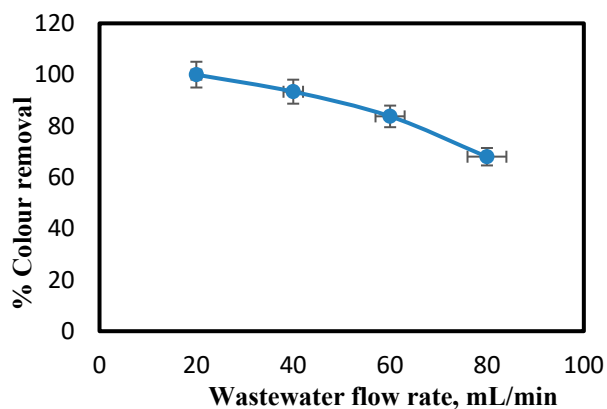

**Figure S7:** Effect of wastewater flow rate on the colour removal percent in homogeneous photocatalytic oxidation by photo-Fenton oxidation [pH=3, Catalyst dose = 0.4 gm/L, reaction time = 30 min, H<sub>2</sub>O<sub>2</sub> = 1 mL/L, 75-watt UV-intensity, and initial dye concentration = 0.75 gm/L]

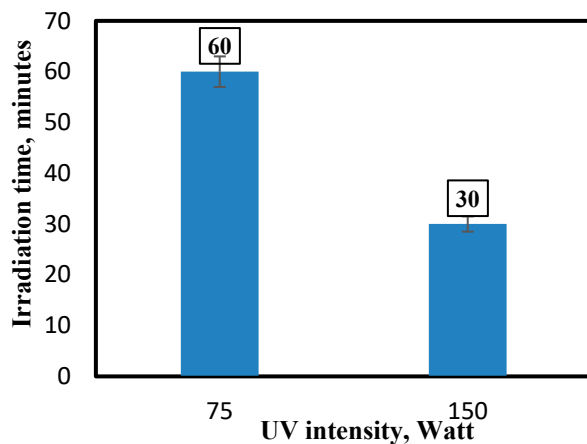

**Figure S8. :** Effect of the light intensity on irradiation time in the homogeneous photo-catalytic oxidation to remove 80 % of COD [ pH =3, H<sub>2</sub>O<sub>2</sub>= 1 mL/L, Catalyst dose = 0.4 mg/L, 20 mL/min flow rate, and initial dye concentration = 0.75 gm/ L]

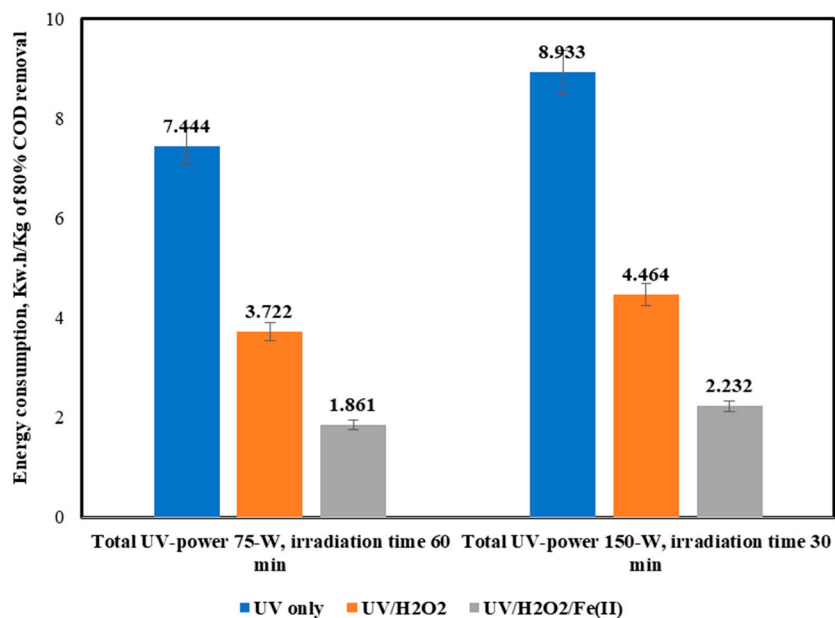

**Figure S9:** Specific energy consumption of 80 % COD removal for UV, UV/H<sub>2</sub>O<sub>2</sub> and UV/H<sub>2</sub>O<sub>2</sub>/Fe (II): (Total UV-power 150-W, irradiation time 30 min) (Total UV-power 75-W, irradiation time 60 min)

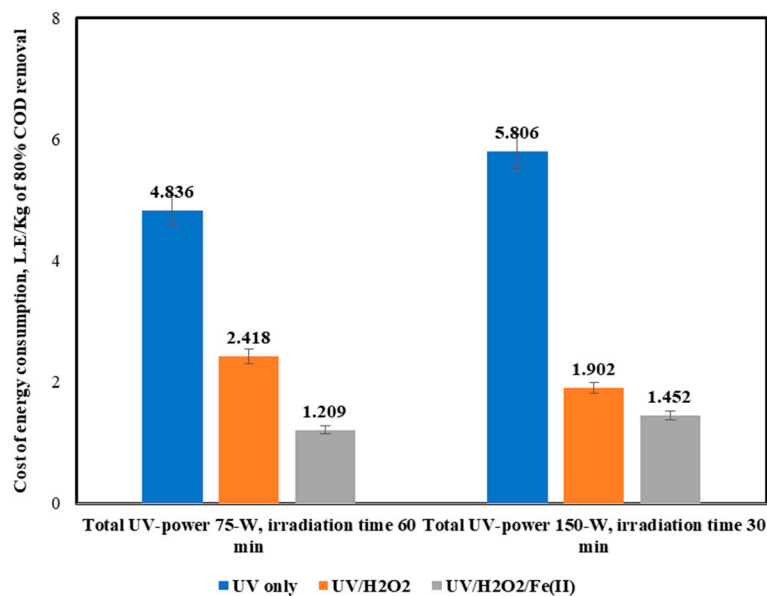

**Figure S10.** Cost of energy consumption of 80 % COD removal for UV, UV/H<sub>2</sub>O<sub>2</sub> and UV/H<sub>2</sub>O<sub>2</sub>/Fe (II): (Total UV-power 75-W, irradiation time 60 min) (Total UV-power 150-W, irradiation time 30 min)

**Table S1:** ANOVA test outcomes for Fenton process [COD removal]

|            | df | SS       | MS       | F           | Significance F |
|------------|----|----------|----------|-------------|----------------|
| Regression | 8  | 2722.589 | 340.3236 | 139.9673642 | 2.99E-06       |
| Residual   | 6  | 14.5887  | 2.43145  |             |                |
| Total      | 14 | 2737.177 |          |             |                |

**Table S2:** Values, p-values, standard error, and t-test for all coefficients [COD removal]

|              | Coefficients | Standard Error | t-Stat   | P-value     | Significance |
|--------------|--------------|----------------|----------|-------------|--------------|
| Intercept    | 67.5727778   | 17.15793       | 3.938283 | 0.00763968  |              |
| X Variable 1 | -163.257222  | 36.01299       | -4.53329 | 0.003961324 | Significance |
| X Variable 2 | -693.976389  | 90.03247       | -7.70807 | 0.000249931 | Significance |
| X Variable 3 | -0.38329167  | 0.030196       | -12.6935 | 1.46594E-05 | Significance |
| X Variable 4 | 0.92591667   | 0.034867       | 26.55549 | 1.88243E-07 | Significance |
| X Variable 5 | 184.923889   | 30.86665       | 5.991058 | 0.000972111 | Significance |
| X Variable 6 | 1855.77431   | 192.9166       | 9.61957  | 7.22258E-05 | Significance |
| X Variable 7 | -53.7877778  | 8.011883       | -6.7135  | 0.000530771 | Significance |

|                     |             |          |          |             |              |
|---------------------|-------------|----------|----------|-------------|--------------|
| <b>X Variable 8</b> | -1319.60069 | 125.1857 | -10.5411 | 4.28531E-05 | Significance |
|---------------------|-------------|----------|----------|-------------|--------------|

**Table S3:** ANOVA test outcomes for Fenton process [Colour removal]

|                   | <b>df</b> | <b>SS</b> | <b>MS</b> | <b>F</b>    | <b>Significance F</b> |
|-------------------|-----------|-----------|-----------|-------------|-----------------------|
| <b>Regression</b> | 8         | 6085.412  | 760.6765  | 12.46536135 | 0.00321               |
| <b>Residual</b>   | 6         | 366.1393  | 61.02322  |             |                       |
| <b>Total</b>      | 14        | 6451.551  |           |             |                       |

**Table S4:** Values, p-values, standard error, and t-test for all coefficients [Colour removal]

|                     | <b>Coefficients</b> | <b>Standard Error</b> | <b>t-Stat</b> | <b>P-value</b> | <b>Significance</b> |
|---------------------|---------------------|-----------------------|---------------|----------------|---------------------|
| <b>Intercept</b>    | 137.3585556         | 85.95671              | 1.597997      | 0.161158678    |                     |
| <b>X Variable 1</b> | -329.7947778        | 180.4156              | -1.82797      | 0.017317222    | Significance        |
| <b>X Variable 2</b> | -1217.336944        | 451.039               | -2.69896      | 0.035625181    | Significance        |
| <b>X Variable 3</b> | -0.503308333        | 0.151274              | -3.32714      | 0.015862979    | Significance        |
| <b>X Variable 4</b> | 2.312166667         | 0.349351              | 6.618454      | 0.000573036    | Significance        |
| <b>X Variable 5</b> | 374.7547778         | 154.6338              | 2.423499      | 0.041616841    | Significance        |
| <b>X Variable 6</b> | 3214.467361         | 966.4612              | 3.326018      | 0.015885087    | Significance        |
| <b>X Variable 7</b> | -110.2042222        | 40.13743              | -2.74567      | 0.033483093    | Significance        |
| <b>X Variable 8</b> | -2278.190972        | 627.1473              | -3.63263      | 0.010930795    | Significance        |

**Table S5:** ANOVA test outcomes for photo-Fenton process [COD removal]

|                   | <b>df</b> | <b>SS</b> | <b>MS</b> | <b>F</b>    | <b>Significance F</b> |
|-------------------|-----------|-----------|-----------|-------------|-----------------------|
| <b>Regression</b> | 9         | 2359.234  | 262.1371  | 13.02082108 | 0.000698              |
| <b>Residual</b>   | 8         | 161.0572  | 20.13215  |             |                       |
| <b>Total</b>      | 17        | 2520.291  |           |             |                       |

**Table S6:** Values, p-values, standard error, and t-test for all coefficients [COD removal]

|                     | <b>Coefficients</b> | <b>Standard Error</b> | <b>t-Stat</b> | <b>P-value</b> | <b>Significance</b> |
|---------------------|---------------------|-----------------------|---------------|----------------|---------------------|
| <b>Intercept</b>    | -347.239            | 55.41569              | -6.26609      | 0.000241468    |                     |
| <b>X Variable 1</b> | -442.1762           | 93.5503               | 4.726614      | 0.00148941     | Significance        |
| <b>X Variable 2</b> | -1172.94            | 233.8757              | 5.015229      | 0.001033003    | Significance        |
| <b>X Variable 3</b> | -0.42782            | 0.086256              | -4.95982      | 0.001107152    | Significance        |
| <b>X Variable 4</b> | 0.185543            | 0.047967              | 3.868149      | 0.004753775    | Significance        |
| <b>X Variable 5</b> | 0.64687             | 0.098125              | 6.592335      | 0.000170746    | Significance        |
| <b>X Variable 6</b> | -319.622            | 84.47761              | -3.78351      | 0.005361214    | Significance        |
| <b>X Variable 7</b> | -2247.64            | 527.9851              | -4.25701      | 0.002772623    | Significance        |
| <b>X Variable 8</b> | 71.40551            | 22.9712               | 3.108479      | 0.01447877     | Significance        |

|                     |          |          |          |             |              |
|---------------------|----------|----------|----------|-------------|--------------|
| <b>X Variable 9</b> | 1303.211 | 358.9251 | 3.630872 | 0.006676594 | Significance |
|---------------------|----------|----------|----------|-------------|--------------|

**Table S7:** ANOVA test outcomes for photo-Fenton process [Colour removal]

|                   | <b>df</b> | <b>SS</b> | <b>MS</b> | <b>F</b> | <b>Significance F</b> |
|-------------------|-----------|-----------|-----------|----------|-----------------------|
| <b>Regression</b> | 7         | 4737.154  | 676.7363  | 13.32126 | 0.000243              |
| <b>Residual</b>   | 10        | 508.0123  | 50.80123  |          |                       |
| <b>Total</b>      | 17        | 5245.166  |           |          |                       |

**Table S8:** Values, p-values, standard error, and t-test for all coefficients [Colour removal]

|                     | <b>Coefficients</b> | <b>Standard Error</b> | <b>t-Stat</b> | <b>P-value</b> | <b>Significance</b> |
|---------------------|---------------------|-----------------------|---------------|----------------|---------------------|
| <b>Intercept</b>    | -677.439            | 89.27573              | -7.58816      | 1.86E-05       |                     |
| <b>X Variable 1</b> | -245.631            | 48.37741              | -5.0774       | 0.00048        | Significance        |
| <b>X Variable 2</b> | -843.838            | 120.9435              | -6.97713      | 3.82E-05       | Significance        |
| <b>X Variable 3</b> | -0.21042            | 0.1127                | -1.86705      | 0.04145        | Significance        |
| <b>X Variable 4</b> | 0.165743            | 0.076196              | 2.175213      | 0.045686       | Significance        |
| <b>X Variable 5</b> | 1.566734            | 0.245894              | 6.371574      | 8.12E-05       | Significance        |
| <b>X Variable 6</b> | 551.1954            | 105.0236              | 5.248299      | 0.000374       | Significance        |
| <b>X Variable 7</b> | 1184.771            | 166.057               | 7.134729      | 3.16E-05       | Significance        |
